# Supplementary material
Source: publisher site journal article supplement (https://www.dovepress.com/get_supplementary_file.php?f=471040.docx)
Supplement: Supplementary file 1 [file get_supplementary_file.php]

**Supplemental Table 1**. ATC Codes of prescriptions for opioid analgesics.

| **Ingredient** | ATC code |
| --- | --- |
| Morphine | N02AA01 |
| Fentanyl | N01AH01, N02AB03 |
| Oxycodone | N02AA05 |
| Buprenorphine | N02AE01 |
| Hydromorphone | N02AA03 |
| Tramadol | N02AX02, N02AX52 |
| Codeine | R05DA04 |
| Meperidine | N02AB02 |

**Supplemental Table 2. Assessing Chronic Opioid Dependence at more than 90 days postoperatively in Patients after Surgery under General Anesthesia**

|  | **No 90-day Postsurgical Opioid Use** | | **Persistent 90-day Postsurgical Opioid Use with Chronic Dependence** | | ***p*** |
| --- | --- | --- | --- | --- | --- |
|  | **N=109,257** | | **N=1,812** | |
|  | **N** | **%** | **N** | **%** |
| **Age** (mean±SD) | 52.90 ± 16.42 | | 61.22 ± 17.46 | | <0.0001 |
| Age, median (IQR), y | 50.00 (29.00,54.00) | | 61.00 (38.00,65.00) | | <0.0001 |
| Age group, years |  |  |  |  | <0.0001 |
| ≤40 | 30,767 | 28.2% | 274 | 15.1% |  |
| 41-50 | 24,612 | 22.5% | 261 | 14.4% |  |
| 51-60 | 20,670 | 18.9% | 340 | 18.8% |  |
| >60 | 33,208 | 30.4% | 937 | 51.7% |  |
| **Sex** |  |  |  |  | <0.0001 |
| Female | 64,755 | 59.3% | 914 | 50.4% |  |
| Male | 44,502 | 40.7% | 898 | 49.6% |  |
| **Income levels (NTD)** |  |  |  |  | <0.0001 |
| Low income | 676 | 0.6% | 26 | 1.4% |  |
| Financial dependent | 24,327 | 22.3% | 412 | 22.7% |  |
| <20000 | 34,627 | 31.7% | 589 | 32.5% |  |
| 2001-30000 | 25,543 | 23.4% | 476 | 26.3% |  |
| 30001-45000 | 15,283 | 14.0% | 214 | 11.8% |  |
| ＞45000 | 8,801 | 8.1% | 95 | 5.2% |  |
| **Urbanization** |  |  |  |  | <0.0001 |
| Rural | 28,543 | 26.1% | 591 | 32.6% |  |
| Urban | 80,714 | 73.9% | 1,221 | 67.4% |  |
| **Surgical types** |  |  |  |  | <0.0001 |
| Mastectomy | 1,234 | 1.1% | 14 | 0.8% |  |
| Knee or hip surgery | 28,398 | 26.0% | 765 | 42.2% |  |
| Open Thoracic surgery | 585 | 0.5% | 22 | 1.2% |  |
| Abdominal surgery | 72,996 | 66.8% | 825 | 45.5% |  |
| Spine surgery | 6,044 | 5.5% | 186 | 10.3% |  |
| **ASA physical status** |  |  |  |  | <0.0001 |
| 1 | 76,878 | 70.4% | 850 | 46.9% |  |
| 2 | 13,451 | 12.3% | 283 | 15.6% |  |
| 3 | 16,075 | 14.7% | 536 | 29.6% |  |
| 4 | 2,853 | 2.6% | 143 | 7.9% |  |
| **Anesthesia duration, hours** |  |  |  |  | <0.0001 |
| ≤2 | 87,897 | 80.5% | 1,253 | 69.2% |  |
| >2 | 21,360 | 19.6% | 559 | 30.9% |  |
| **Hospital levels** |  |  |  |  | 0.0004 |
| Non-Medical centers | 75,137 | 68.8% | 1,176 | 64.9% |  |
| Medical centers | 34,120 | 31.2% | 636 | 35.1% |  |
| **Preoperative Opioid Use Within 7 Days** |  |  |  |  | <0.0001 |
| No | 108,875 | 99.7% | 1,751 | 96.6% |  |
| Yes | 382 | 0.4% | 61 | 3.4% |  |
| **Preoperative Non-Opioid Analgesic Use Within 7 Days** |  |  |  |  | <0.0001 |
| No | 41,409 | 37.9% | 418 | 23.1% |  |
| Yes | 67,848 | 62.1% | 1,394 | 76.9% |  |
| **Coexisting Comorbidities** |  |  |  |  |  |
| Depression | 3,239 | 3.0% | 129 | 7.1% | <0.0001 |
| Anxiety | 6,360 | 5.8% | 232 | 12.8% | <0.0001 |
| Dysthymic disorder | 2,144 | 2.0% | 86 | 4.8% | <0.0001 |
| Peripheral vascular diseases | 1,565 | 1.4% | 78 | 4.3% | <0.0001 |
| Osteoporosis | 3,938 | 3.6% | 142 | 7.8% | <0.0001 |
| Gout | 6,712 | 6.1% | 250 | 13.8% | <0.0001 |
| Headache | 15,385 | 14.1% | 437 | 24.1% | <0.0001 |
| Rheumatoid arthritis | 1,392 | 1.3% | 64 | 3.5% | <0.0001 |
| Pressure ulcer | 503 | 0.5% | 25 | 1.4% | <0.0001 |
| Chronic obstructive pulmonary disease | 8,431 | 7.7% | 306 | 16.9% | <0.0001 |
| Acute respiratory distress | 1,033 | 1.0% | 60 | 3.3% | <0.0001 |
| Diabetes | 7,961 | 7.3% | 298 | 16.5% | <0.0001 |
| Hypertension | 16,752 | 15.3% | 603 | 33.3% | <0.0001 |
| Hyperlipidemia | 9,195 | 8.4% | 332 | 18.3% | <0.0001 |
| **CCI Scores** |  |  |  |  |  |
| Mean (SD) | 0.27 ± 0.71 | | 0.57 ± 1.02 | | <0.0001 |
| Median (Q1-Q3) | 0.00 (0.00,0.00) | | 0.00 (0.00,1.00) | | <0.0001 |
| CCI Scores |  |  |  |  | <0.0001 |
| 0 | 92,437 | 84.6% | 1,264 | 69.8% |  |
| ≥1 | 16,820 | 15.4% | 548 | 30.2% |  |
| CCI Scores |  |  |  |  |  |
| Congestive Heart Failure | 1,243 | 1.1% | 74 | 4.1% | <0.0001 |
| Dementia | 65 | 0.1% | 0 | 0.0% | 0.2990 |
| Chronic Pulmonary Disease | 7,100 | 6.5% | 230 | 12.7% | <0.0001 |
| Rheumatic Disease | 512 | 0.5% | 20 | 1.1% | 0.0001 |
| Liver Disease | 8,237 | 7.5% | 224 | 12.4% | <0.0001 |
| Diabetes with complications | 1,313 | 1.2% | 73 | 4.0% | <0.0001 |
| Hemiplegia and Paraplegia | 1 | 0.0% | 0 | 0.0% | 0.9594 |
| Renal Disease | 1,208 | 1.1% | 75 | 4.1% | <0.0001 |
| Acquired Immunodeficiency Syndrome | 43 | 0.0% | 1 | 0.1% | 0.7370 |

**Abbreviations**: ASA: American Society of Anesthesiologists; CCI: Charlson Comorbidity Index; SD: Standard Deviation; IQR: Interquartile Range; NTD: New Taiwan Dollar; N: Numbers; Q1: First Quartile; Q3: Third Quartile.
